# Supplementary material for: Characterization of essential eggshell proteins from Aedes aegypti mosquitoes
Source: Springer Nature journal article supplement (doi:10.1186/s12915-023-01721-z), 2023-10-13
Supplement: MOESM10 [file 12915_2023_1721_MOESM10_ESM.pdf]

## Additional file 10.

Table S9. Reproductive phenotypes associated with RNAi in *Aedes aegypti*.

|                                      | RNAi | Fluc   | DCE2   | DCE4   | DCE5   | CATL3  |
|--------------------------------------|------|--------|--------|--------|--------|--------|
| <i>Fecundity</i>                     |      |        |        |        |        |        |
| Number of mosquitoes examined        |      | 23     | 24     | 25     | 25     | 26     |
| Total number of eggs oviposited      |      | 2022   | 2128   | 2144   | 2130   | 2195   |
| Mean number of eggs oviposited       |      | 87.9   | 88.7   | 85.8   | 85.2   | 84.4   |
| <i>Eggshell melanization</i>         |      |        |        |        |        |        |
| Number of eggs examined              |      | 2022   | 2128   | 2144   | 2130   | 2195   |
| Incompletely tanned eggs oviposited  |      | 19     | 2036   | 27     | 36     | 952    |
| Incomplete eggshell melanization (%) |      | 0.94%  | 95.68% | 1.26%  | 1.69%  | 43.37% |
| <i>Egg viability</i>                 |      |        |        |        |        |        |
| Number of eggs examined              |      | 605    | 751    | 685    | 714    | 767    |
| Number of eggs hatched               |      | 557    | 45     | 623    | 630    | 33     |
| Egg viability (%)                    |      | 92.07% | 5.99%  | 90.95% | 88.24% | 4.30%  |

Egg phenotypes are shown in Figure 7.

dsRNA was microinjected 4 days prior to blood feeding as shown in Figure 1.
